# Supplementary material for: Combustion Synthesis of MAX Phases: Microstructure and Properties Inherited from the Processing Pathway
Source: MDPI journal article supplement (doi:10.3390/cryst13071143), 2023-07-22
Supplement: s1 [file s1]

**Table S1. Self-propagating high-temperature synthesis protocols of some MAX phases in chronological order**

| N | Aim of the work                                          | Initial mixture                                                                                                                         | Process and sample parameters after SHS | Products                                                                                                              | Reference              | Comment                                                                                                                                                        |
|---|----------------------------------------------------------|-----------------------------------------------------------------------------------------------------------------------------------------|-----------------------------------------|-----------------------------------------------------------------------------------------------------------------------|------------------------|----------------------------------------------------------------------------------------------------------------------------------------------------------------|
| 1 | V2AlC by SHS metallothermy                               | 26.6V2O5/28.2Mg/4.5 Al/0.7C/40NaCl, 3 MPa Ar, dry mixing, 60rpm, 2h                                                                     | -                                       | V2AlC (95%), VAl, VC with 20 mm mean particle size (after acid leaching MgO and MgAl2O4 were removed)                 | Vershinnikov 2023 [79] | The minimum VC content was observed at 60% C deficiency, 60% Al excess.                                                                                        |
| 2 | Al-Ti-C porous structures by magnetic field-assisted SHS | Ti:Al:C=2:1:1, SHS in magnetic field                                                                                                    | Tc=1500-1600oC                          | TiAl, TiC, Ti2AlC and Ti3AlC2                                                                                         | Dmitruk 2022 [31]      | Ball milling was done to activate powders for producing porous structures                                                                                      |
| 3 | SHS aluminothermy of Mo3Al2C                             | Mixture of MoO3 + Al + C + Al2O3 combusted in 5 MPa Ar pressure                                                                         | -                                       | Mo3Al2C, Mo-Al and Mo-C as byproducts                                                                                 | Kovalev 2022 [81]      | The largest percentage of Mo3Al2C in the ingot was reached at 20% Al2O3 addition.                                                                              |
| 4 | Ti2AlN <sub>x</sub>                                      | Hydride cycle was used for the synthesis of Ti2AlN <sub>x</sub> MAX phase from titanium hydridonitride or Ti2Al intermetallic compound. |                                         |                                                                                                                       | Aleksanyan 2022 [56]   | Hydride cycle includes the synthesis of III-V transition metal hydrides by SHS, cold isostatic pressing and dehydrogenation-sintering in vacuum at 900–1150oC. |
| 5 | SHS of Ti3(Al,Si)C2 composite                            | Hot pressing of SHS derived Ti3AlC2 and Ti3SiC2 powders, duration 1 h, T=1300oC, 25MPa                                                  | -                                       | Ti3Al <sub>(1-x)</sub> Si <sub>x</sub> C2 (x = 0 to x = 1) MAX-phase with 10% TiC, at x=0, TiC was 12.5% when x=1, up | Goc2021 [88]           | During hot pressing process, the TiC and TiSi2 impurities present in powders convert into MAX phase.                                                           |

|   |                                                                            | pressure                                                                                                                          |                                                                                                                      | to 27%TiC and 11%TiSi <sub>2</sub> were present                                                                                                                                                                                                                                                                                 |                        |                                                                                                                                                                               |
|---|----------------------------------------------------------------------------|-----------------------------------------------------------------------------------------------------------------------------------|----------------------------------------------------------------------------------------------------------------------|---------------------------------------------------------------------------------------------------------------------------------------------------------------------------------------------------------------------------------------------------------------------------------------------------------------------------------|------------------------|-------------------------------------------------------------------------------------------------------------------------------------------------------------------------------|
| 6 | Preparation of (Cr, Mn, V)- Al-C MAX phases by SHS metallothermy           | chromium (III) oxide, manganese (IV) oxide, vanadium (V) oxide, calcium (IV) oxide, aluminum, and carbon, SHS in 5MPa Ar pressure | 1.Cr-Al-C, U <sub>c</sub> =0.6 cm/s<br>2.Cr-Mn-Al-C, U <sub>c</sub> =0.83 cm/s<br>3.V-Al-C, U <sub>c</sub> =4.5 cm/s | 1.Cr <sub>2</sub> AlC, Cr <sub>5</sub> Al <sub>8</sub> , Cr <sub>7</sub> C <sub>3</sub> , Cr <sub>3</sub> C <sub>2</sub><br>2. (Cr <sub>x</sub> Mn <sub>1-x</sub> ) <sub>2</sub> AlC solid solution, Mn <sub>3</sub> AlC, and Cr <sub>2</sub> Al.<br>3. V <sub>2</sub> AlC and traces of VC <sub>x</sub> and VAl <sub>3</sub> . | Gorshkov2021 [71]      | CaO <sub>2</sub> +Al exothermic mixture was used to intensify SHS (T <sub>ad</sub> >4000K). Slag contained CaO-Al <sub>2</sub> O <sub>3</sub> mixture.                        |
| 7 | Preparation of (V,Cr) <sub>2</sub> AlC solid solution                      | vanadium(V) and chromium(III) oxides with aluminum and carbon (graphite).                                                         | RT resistance was 1.14 μΩ m, which is higher than that of V <sub>2</sub> AlC and Cr <sub>2</sub> AlC                 | The product also contains vanadium and chromium carbides and intermetallics.                                                                                                                                                                                                                                                    | Sychev 2021 [72]       | Nonequilibrium character of the synthesis process due to a short “lifetime” of melt and its fast cooling and crystallization result in impurities.                            |
| 8 | SHS in Cr-Ti-Al-C system                                                   | 70% (Cr <sub>2</sub> O <sub>3</sub> + 3Al + C)/(2Ti + Al + C) + 30% (3CaO <sub>2</sub> + 2Al) mixture, 5 MPa Ar pressure          | -                                                                                                                    | (Cr <sub>1-x</sub> Ti <sub>x</sub> ) <sub>2</sub> AlC (x = 0.18–0.28) phase of 43-62%, along with Ti <sub>0.9</sub> Cr <sub>0.1</sub> C, Cr <sub>7</sub> C <sub>3</sub> , Cr <sub>3</sub> C <sub>2</sub> and intermetallics (Al <sub>8</sub> Cr <sub>5</sub> , AlTi <sub>3</sub> )                                              | Gorshkov 2021 [73]     | Impurities are associated by the insufficient lifetime of the melt formed in the combustion wave.                                                                             |
| 9 | SHS of Ti <sub>2</sub> AlC and Ti <sub>3</sub> AlC <sub>2</sub> MAX phases | Ball milling for 2h, then SHS in boat at 4MPa Ar pressure of TiO <sub>2</sub> , Mg, C mixture                                     |                                                                                                                      | Ti <sub>2</sub> AlC, MgAl <sub>2</sub> O <sub>4</sub> , and TiC at Mg deficiency, 20-30%Mg excess lead to Ti <sub>2</sub> AlC and TiC, target product                                                                                                                                                                           | Vershinnikov 2020 [64] | MgO removed HCl at 70oC. Increasing soot, lead to Ti <sub>3</sub> AlC <sub>2</sub> , Ti <sub>2</sub> AlC and TiC, while low soot decreases TiC, yield 35-40% after MgOremoval |

|           |                                                                                                               |                                                                                                                                              |                                                                                                                                                       |                                                                                                                         |                    |                                                                                                                                                        |
|-----------|---------------------------------------------------------------------------------------------------------------|----------------------------------------------------------------------------------------------------------------------------------------------|-------------------------------------------------------------------------------------------------------------------------------------------------------|-------------------------------------------------------------------------------------------------------------------------|--------------------|--------------------------------------------------------------------------------------------------------------------------------------------------------|
| about 93% |                                                                                                               |                                                                                                                                              |                                                                                                                                                       |                                                                                                                         |                    |                                                                                                                                                        |
| 10        | The influence of precursor on SHS of Cr <sub>2</sub> AlC                                                      | CaCrO <sub>4</sub> + Al + C mixture at 5 MPa Ar pressure                                                                                     | Uc=11-7.5 mm/s vs low and high carbon content                                                                                                         | Cr <sub>2</sub> AlC (67vol%), also contained Cr <sub>7</sub> C <sub>3</sub> and Cr <sub>5</sub> Al                      | Gorshkov2020 [74]  | CaCrO <sub>4</sub> was better than CrO <sub>3</sub> , which is hygroscopic and thermally unstable.                                                     |
| 11        | SHS of Ti-Si-C and Nb-Al-C systems                                                                            | Mixtures of powders of Ti, Si, Nb, Al, and C, pressed to porous compact (40-45% density) of 20x32 mm in size, SHS in Ar atmosphere           | Tc= 2373 ± 25 K for Ti-Si-C mixture                                                                                                                   | Ti <sub>3</sub> SiC <sub>2</sub> (with 12-18vol%TiC), Nb <sub>2</sub> AlC with NbC and Nb <sub>4</sub> AlC <sub>3</sub> | Afanasyev2020 [39] | Annealing at 1400oC or sintering at 1200oC for 4 h in vacuum increases Ti <sub>3</sub> SiC <sub>2</sub> content up to 98vol%                           |
| 12        | SHS of V <sub>2</sub> AlC MAX phase                                                                           | vanadium oxide(V) and (IV) powders with aluminum and carbon (graphite). 5 MPa Ar pressure                                                    | grain size of the V <sub>2</sub> AlC phase was 8-10 µm and a layer thickness – 40-70 nm                                                               | V <sub>2</sub> AlC (65wt%) with VC <sub>x</sub> , V <sub>2</sub> C, VAl, VAl <sub>3</sub> phases.                       | Gorshkov2020 [80]  | V <sub>2</sub> AlC MAX phase is an electrical conductor that demonstrates metallic behavior of conductivity in 300-1300 K interval.                    |
| 13        | Nb <sub>2</sub> AlC by SHS metallotherapy                                                                     | Combustion of Nb <sub>2</sub> O <sub>5</sub> –Al–C mixture in the presence of exothermic CaO <sub>2</sub> –Al additive at 5 MPa Ar pressure. | Uc increases from 6 to 12 mm/s with an increase in the additive content, (up to 15 wt % additive)                                                     | Nb <sub>2</sub> AlC (67 wt %) NbAl <sub>3</sub> (24%), NbC (9%).                                                        | Kovalev2020 [67]   | -                                                                                                                                                      |
| 14        | Ti <sub>3</sub> AlC <sub>2</sub> and Ti <sub>3</sub> C <sub>2</sub> T <sub>x</sub> synthesis via SHS grinding | stoichiometry of Ti:Al:C=3:2:1.5, the obtained SHS-ground powder was further ground to a size of <38 mkm.                                    | Tc=1700oC, the duration of whole process was 30-35 s. Ti <sub>3</sub> C <sub>2</sub> T <sub>x</sub> MXene possess high electrical conductivity (~3267 | Ti <sub>3</sub> AlC <sub>2</sub> (82.5%, 10 s delay time),                                                              | Pazniak2019 [28]   | The formation mechanism of Ti <sub>3</sub> AlC <sub>2</sub> from elements includes Al melting, the reaction between Al and Ti, carbon diffusion in the |

| S*cm1) |                                                                              |                                                                                                                                                                                 |                                                                                                |                                                                                                                                                                                                        | Ti-Al intermetallics,<br>formation of TiC, Ti-Al-C |                                                                                               |
|--------|------------------------------------------------------------------------------|---------------------------------------------------------------------------------------------------------------------------------------------------------------------------------|------------------------------------------------------------------------------------------------|--------------------------------------------------------------------------------------------------------------------------------------------------------------------------------------------------------|----------------------------------------------------|-----------------------------------------------------------------------------------------------|
| 15     | Sol-gel synthesis of Cr <sub>2</sub> GaC                                     | Nitrates of Cr and Ga, citric acid, heated at 70-80oC, Ar flow, then annealing of gel at 900oC 5 h.                                                                             |                                                                                                | Cr <sub>2</sub> GaC, Cr <sub>2</sub> O <sub>3</sub> , Cr <sub>3</sub> C <sub>2</sub>                                                                                                                   | Siebert2019 [62]                                   |                                                                                               |
| 16     | Zr <sub>2</sub> SC MAX phase by SHS and the influence of molybdenum addition | Zr:Mo:S:C=2-x:x:1:1 (x = 0 to 1.2) mixtures were hydraulic pressed for molding pellets with 12 mm in diameter and 10 mm in height                                               | Zr <sub>2</sub> SC phase consisted of belt-like crystals in the order of 40 to 50 nm in width. | Zr <sub>2</sub> SC with ZrC when x=0, at x=0.2-0.6, Mo <sub>2</sub> C and Zr are formed along with Zr <sub>2</sub> SC, at x=0.8 only Zr <sub>3</sub> S <sub>4</sub> and Mo <sub>2</sub> C are present. | Tomoshige2019 [41]                                 | Mo-added Zr <sub>2</sub> SC MAX phase might become promising material in the solid lubricity. |
| 17     | Ti <sub>3</sub> SiC <sub>2</sub> -Ni composite preparation                   | Ti, Si, technical carbon with 3:1.25:2 ratio, dried at T = 60–70°C, mixed in a ball mill for 1 h. Pressed to 50% porosity, 20 mm in diameter. Then Ni or Ni-Si alloy was added. | -                                                                                              | The more homogeneous composite material based on TiC, TiSi <sub>2</sub> , and Ti <sub>3</sub> SiC <sub>2</sub> partially filled with the nickel–silicon alloy was formed by alloying 20wt%Ni.          | Amosov2019 [26]                                    | An increase in the Ni content (50%) leads to the complete disappearance of the MAX phase.     |
| 18     | The influence of AlN nanoparticles on TiB/Ti-Based Materials Obtained by     | 3 mixtures of Ti -87 wt%, B-13 wt%, with 0, 3 and 5 wt% AlN content, relative density of 0.38-0.49.                                                                             | Tc1=1750-1800oC, Uc1=12mm/s, Tc2=1750-1800oC, Uc2=10mm/s, Tc3=1680-1750oC, Uc3=8mm/s.          | Ti <sub>2</sub> AlN and Ti <sub>4</sub> AlN <sub>3</sub> MAX phases                                                                                                                                    | Bolotskaia2019 [57]                                | At 5wt% AlN addition MAX phases undergo decomposition.                                        |

---

SHS Extrusion

|    |                                                                                                          |                                                                                                                                                          |                                                                             |                                                                                                                                                                                              |                     |                                                                                                                                                                                                 |
|----|----------------------------------------------------------------------------------------------------------|----------------------------------------------------------------------------------------------------------------------------------------------------------|-----------------------------------------------------------------------------|----------------------------------------------------------------------------------------------------------------------------------------------------------------------------------------------|---------------------|-------------------------------------------------------------------------------------------------------------------------------------------------------------------------------------------------|
| 19 | Ti/Ti–Al–C system obtained under the SHS compaction                                                      | mixture of 64.2 Ti, 27.1 Al, and 8.7 soot wt% dried, ball milled for 4 h, pressed at 5 MPa, cylindrical blanks 30 x20 mm with a relative density of 0.65 | Tc=1350-1500oC.                                                             | 60 wt.% Ti <sub>3</sub> AlC <sub>2</sub> and 10 wt.% Ti <sub>2</sub> AlC, as well as 20 wt.% of rounded TiC grains and 10 wt.% of the Ti <sub>5</sub> Al <sub>11</sub> and TiAl <sub>3</sub> | Averichev2019 [30]  | -                                                                                                                                                                                               |
| 20 | SHS of Ti <sub>3</sub> SiC <sub>2</sub> -Based Materials in the Ti–Si–C System: Impact of Silicon Excess | Ti:Si:graphite=3:(1+x):2, ball milling for 24 h, Ar pressure 1.5 atm, hot pressing at 1450oC for 1 h.                                                    | SHS-produced powders revealed a plate-like morphology typical of MAX phases | Ti <sub>3</sub> SiC <sub>2</sub> (88.2 wt %) was obtained in case of stoichiometric (x = 0) reaction                                                                                         | Lis2019 [38]        | Hot-pressing of SHS-produced powder with x = 0 was found to yield a dense (4.5 g/cm <sup>3</sup> ) polycrystalline material containing 81 wt % Ti <sub>3</sub> SiC <sub>2</sub> and 19 wt % TiC |
| 21 | SHS of Nb <sub>2</sub> AlC MAX phase                                                                     | Nb <sub>2</sub> O <sub>5</sub> , Al, and C powders with a(CaO <sub>2</sub> + Al) additive (Tc up to 4250K) in 5 MPa Ar pressure                          |                                                                             | Nb <sub>3</sub> Al <sub>2</sub> C (77%) was formed together with Nb <sub>2</sub> Al (19%) and NbC (4%) at a=20%                                                                              | Miloserdov2019 [68] | Tc=2870 K, a>10% the combustion products are separated into two layers under the action of gravity                                                                                              |
| 22 | Preparation of Ti <sub>3</sub> AlC <sub>2</sub> by SHS followed by HP                                    | Ti <sub>3</sub> Al and TiAl intermetallics and pure Ti, Al, C element                                                                                    |                                                                             | 80% Ti <sub>3</sub> AlC <sub>2</sub>                                                                                                                                                         | Goc 2018[19]        | Higher residual resistivity ratios than those reported in the literature are found due to lower content of defects.                                                                             |

---

|    |                                                                                 |                                                                                                                                                                          |                                                                                                                                     |                                                                                                                                                  |                       |                                                                                                                                                             |
|----|---------------------------------------------------------------------------------|--------------------------------------------------------------------------------------------------------------------------------------------------------------------------|-------------------------------------------------------------------------------------------------------------------------------------|--------------------------------------------------------------------------------------------------------------------------------------------------|-----------------------|-------------------------------------------------------------------------------------------------------------------------------------------------------------|
| 23 | Thermal explosion of Ti <sub>3</sub> AlC <sub>2</sub> phase from MA mixture     | Ti:Al:C=3:1:2, ball milled for 1 h, cold pressed at 300 MPa to cylinder 10x15 mm, density 60%, SHS in vacuum, explosion mode in tubular furnace at 1000oC under Ar flow. | T <sub>c</sub> =1673oC SHS mode, T <sub>max</sub> =1528oC in explosion mode. Ball-milling did not led to the compositional changes. | Ti <sub>3</sub> AlC <sub>2</sub> , and TiC as a byproduct                                                                                        | Akhlaghi2018 [29]     | Thermal explosion mode allowed to produce purer MAX Ti <sub>3</sub> AlC <sub>2</sub> phase (85%) than wave propagation mode (60%).                          |
| 24 | Aluminothermic SHS in CaCrO <sub>4</sub> -Al-C Mixtures under Nitrogen Pressure | (CaCrO <sub>4</sub> + 2 Al) + nC mixtures, ball milling, ignited under 5 MPa of nitrogen.                                                                                | U <sub>c</sub> decreases from 11 to 7.5mm/s increasing carbon wt% to 3.7%.                                                          | At n = 3.7 wt %, practically single-phase Cr <sub>2</sub> AlC was formed.                                                                        | Miloserdov2018 [75]   | In the absence of graphite (n = 0), Cr <sub>2</sub> Al was formed.                                                                                          |
| 25 | Synthesis of the Ti <sub>2</sub> AlC MAX Phase                                  | TiO <sub>2</sub> , Al, carbon black, combusted at 5 MPa argon pressure...                                                                                                | -                                                                                                                                   | Ti <sub>2</sub> AlC and up to 7% TiC are formed.                                                                                                 | Vershinnokov2018 [65] | Replacing carbon black by graphite Ti <sub>2</sub> AlC with well-defined laminate layers are obtained.                                                      |
| 26 | Ti <sub>3</sub> SiC <sub>2</sub> preforms with open porosity by MW assisted SHS | Ti:Si:C=3:1.2:1 mixed, milled 10 min, cold pressed (930 MPa, 60sec) Magnetron power 300-400W.                                                                            | T <sub>c</sub> >1800oC                                                                                                              | Ti <sub>3</sub> SiC <sub>2</sub> elongated plate-like grains 10÷20 μm in length and 1 thickness, with inclusions TiC, TiSi <sub>2</sub> and SiC. | Dmitruk2018 [61]      | If the SHS reaction temperature does not exceed 1330°C, which is the lowest Ti-Si eutectic point, reaction occur by solid-solid mechanism.                  |
| 27 | Single-stage preparation of Cu-Ti <sub>3</sub> SiC <sub>2</sub> composite       | 3Ti+1,25Si+2C in the presence of Cu, ball milling 1h, cold pressed briquette, density 0.5.                                                                               | -                                                                                                                                   | Ti <sub>3</sub> SiC <sub>2</sub> , with Ti carbide and silicide were formed. In the Cu infiltration region consisting of a mixture of Ti         | Amosov2018 [37]       | The preparation of Me-Ti <sub>3</sub> SiC <sub>2</sub> composites impregnated with metals Me=Ni, Ti, Fe prevents the formation of the MAX phase. Only 10%Si |

|    |                                                                               |                                                                                                                                                                                        |                                                                                                                                                                                                               |                                                                                                                                                                                                      |                     |                                                                                                                                                                                                    |
|----|-------------------------------------------------------------------------------|----------------------------------------------------------------------------------------------------------------------------------------------------------------------------------------|---------------------------------------------------------------------------------------------------------------------------------------------------------------------------------------------------------------|------------------------------------------------------------------------------------------------------------------------------------------------------------------------------------------------------|---------------------|----------------------------------------------------------------------------------------------------------------------------------------------------------------------------------------------------|
|    |                                                                               |                                                                                                                                                                                        |                                                                                                                                                                                                               | carbide and Ti silicide, adjoins the Cu area.                                                                                                                                                        |                     | addition to Cu briquette, increased MAX phase amount markedly.                                                                                                                                     |
| 28 | Materials based on the Cr <sub>2</sub> AlC MAX phase and SHS metallurgy       | chromium III and chromium VI oxides of the analytical grade, aluminum and carbon, 5 MPa pressure.                                                                                      | U <sub>c</sub> = 7.2 mm/s, nanolaminate structure with the layer thickness from 3 to 20 nm.                                                                                                                   | Cr <sub>2</sub> AlC (86%), Cr <sub>7</sub> C <sub>3</sub> , Cr <sub>2</sub> Al <sub>8</sub> , The bottom layer is metallic (Cr– Al–C) and the top layer is oxide (Al <sub>2</sub> O <sub>3</sub> ).  | Gorshkov2017 [76]   | An increase in the content of the Cr <sub>2</sub> AlC MAX phase and a decrease in the Cr <sub>5</sub> Al <sub>8</sub> content occur with an increase in the C and Al content.                      |
| 29 | Cr <sub>2</sub> AlC MAX phase by SHS metallurgy                               | -                                                                                                                                                                                      | High stability in HCl and HF media up to 120h                                                                                                                                                                 | 95%Cr <sub>2</sub> AlC, pure according to XRD                                                                                                                                                        | Gorshkov 2017 [76]  |                                                                                                                                                                                                    |
| 30 | Ti <sub>3</sub> (Al,Sn)C <sub>2</sub> solid solutions by combustion synthesis | Ti, Al, Sn, carbon black, Al <sub>4</sub> C <sub>3</sub> , TiC, to obtain Ti <sub>3</sub> (Al <sub>1-x</sub> Sn <sub>x</sub> )C <sub>2</sub> , where x =0-0.8 mol                      | T <sub>c</sub> =1590-1700 oC U <sub>c</sub> = 14.2–18.8 mm/s for Al <sub>4</sub> C <sub>3</sub> -added samples, and T <sub>c</sub> = 1220–1280 oC and U <sub>c</sub> =7.1–9.6 mm/s, for the TiC added samples | Ti <sub>3</sub> (Al,Sn)C <sub>2</sub> grains were plate-like and closely stacked into a laminated microstructure, with a thickness about 1 μm and a size of 6–10 μm.                                 | Yeh Chiang2017 [46] | The extent of Sn substitution for Al to form Ti <sub>3</sub> (Al,Sn)C <sub>2</sub> is narrower for the TiC-adopted sample y=0.6, but wider for Al <sub>4</sub> C <sub>3</sub> one x=0.8.           |
| 31 | Ti <sub>2</sub> AlN ceramic by the thermal explosion (TE) technique           | 1.1:1.1:1(Ti: Al: TiN mixture,milled for 4h, compressed into cylindrical discs, put into preheated furnace 700oC, after holding 2 min were colled down and examined. Tad (Ti-Al)=1517K |                                                                                                                                                                                                               | Ti <sub>2</sub> AlN ceramic containing 4% TiN could be fabricated at 700 °C for 2 min. It was further found that small particle size of TiN and compacts' height of 2–8 mm were beneficial to obtain | Liu2017 [51]        | Moderate excess of Ti and Al in the powder mixtures is beneficial to the formation of high purity Ti <sub>2</sub> AlN. Higher excess of Ti and Al lead to high Tad and decomposition of MAX phase. |

| high purity Ti <sub>2</sub> AlN |                                                                                                   |                                                                                                                                                        |                                                                                                                      |                                                                                                                                                           |                      |                                                                                                                                                                                                      |
|---------------------------------|---------------------------------------------------------------------------------------------------|--------------------------------------------------------------------------------------------------------------------------------------------------------|----------------------------------------------------------------------------------------------------------------------|-----------------------------------------------------------------------------------------------------------------------------------------------------------|----------------------|------------------------------------------------------------------------------------------------------------------------------------------------------------------------------------------------------|
| 32                              | SHS of Ti <sub>2</sub> AlN and its hot pressing                                                   | Ti <sub>3</sub> Al, Al, N <sub>2</sub> (+50% Al excess) 1.5-5 atm N <sub>2</sub> pressure, ignition time up to 60s.                                    | Hot pressing of powders at 1250, 1300, 1350 and 1400°C, time of annealing 1 hour, P <sub>N<sub>2</sub></sub> =25 MPa | The highest content of 211 phase was obtained from hot pressing at 1300°C for 1hour (73.9 wt.% of Ti <sub>2</sub> AlN)                                    | Chlubny2017 [53]     | At 1400°C composite material containing 60.4 wt.% of Ti <sub>4</sub> AlN <sub>3</sub> and 35.9 wt.% of Ti <sub>2</sub> AlN was obtained.                                                             |
| 33                              | Effect of Al on formation of TaC, Ta <sub>2</sub> C, and Ta <sub>2</sub> AlC by SHS aluminothermy | Ta <sub>2</sub> O <sub>5</sub> , Al, Al <sub>4</sub> C <sub>3</sub> , and carbon black, ball milled, cold pressed (7x12mm), cylinders with 50%density. | U <sub>c</sub> =1450-2000oC, U <sub>c</sub> =8-14 cm/s                                                               | Ta <sub>2</sub> AlC, TaC, Ta <sub>2</sub> C and Al <sub>2</sub> O <sub>3</sub> . When Al is the only Al source MAX formation was improved                 | Yeh 2017 [78]        | Compared to Al <sub>4</sub> C <sub>3</sub> , elemental Al was demonstrated to be a more effective reductant for Ta <sub>2</sub> O <sub>5</sub> .                                                     |
| 34                              | The preparation of boron containing MAX phase                                                     | 3Ti+2Al+2((1-x)C+xB), where x is the fraction of boron atoms, mixing drying, pressing up to 40% density, 23x11mm in size.                              |                                                                                                                      | (x=0.10-0.50), Ti <sub>3</sub> AlC <sub>2</sub> and TiC are formed, but When x=0.75 and 0.9, TiB and TiB <sub>2</sub> are formed with AlTi <sub>3</sub> . | Amosov2017 [32]      | ParIf more than half of the carbon atoms is replaced by boron atoms in the charge, the MAX-phase is not formed, and TiB, TiB <sub>2</sub> and Al <sub>3</sub> Ti become the main synthesized phases. |
| 35                              | Mechanochemical synthesis mechanism of Ti <sub>3</sub> AlC <sub>2</sub> MAX phase                 | Ti, Al and graphite with stoichiometric 3:1:2 ratio, milled by a planetary ball mill up to 10 h.                                                       | After 8.33 h of milling time, the temperature of vial increased rapidly initiating combustion                        | Ti <sub>3</sub> AlC <sub>2</sub> , TiC.                                                                                                                   | Shahin2016 [17]      | The direct temperature measuring of the powders during ball milling was impossible.                                                                                                                  |
| 36                              | Ti <sub>2</sub> AlC MAX phases with TiC carbide by MW                                             | Ti, graphite, Al, 2:1:1 ratio, mixing 10 min, uniaxial cold-                                                                                           | Tig = 670°C, when the melting point of Al was attained.                                                              | Ti <sub>2</sub> AlC plate-like grains with TiC crystals                                                                                                   | Koniuszewka2016 [27] | Ti <sub>2</sub> AlC is supposed to be fabricated by a solid-liquid reaction during the                                                                                                               |



|    |                                                                                |                                                                                                                                                                                                                                                                          |                                                                                                 |                                                                                                                                                                                                                                                                                                                                         |                    |                                                                                                                                                                                              |
|----|--------------------------------------------------------------------------------|--------------------------------------------------------------------------------------------------------------------------------------------------------------------------------------------------------------------------------------------------------------------------|-------------------------------------------------------------------------------------------------|-----------------------------------------------------------------------------------------------------------------------------------------------------------------------------------------------------------------------------------------------------------------------------------------------------------------------------------------|--------------------|----------------------------------------------------------------------------------------------------------------------------------------------------------------------------------------------|
|    | assisted SHS                                                                   | pressing, pellets of 23 mm in diameter under a pressure of 800 MPa for 10 second. Magnetron power 200-400W.                                                                                                                                                              | Tc=1600°C. Compact deformation includes axial elongation and radial contraction.                |                                                                                                                                                                                                                                                                                                                                         |                    | cooling process, the Ti <sub>2</sub> AlC MAX phase is precipitated from the solution of TiC and Al-Ti melt during the peritectic reaction.                                                   |
| 37 | Rapid synthesis of Ti <sub>2</sub> AlN ceramic via thermal explosion           | Ti/Al/TiN= 1:1.05:1 as raw material at ignition temperatures ranging from 650 °C to 850 °C for 2 min                                                                                                                                                                     |                                                                                                 | Ti <sub>2</sub> AlN, TiN                                                                                                                                                                                                                                                                                                                | [52] Liu2015       |                                                                                                                                                                                              |
| 38 | MA SHS Ti <sub>3</sub> AlC <sub>2</sub> (pressed by force SHS pressing, 7 MPa) | Elements of 312 ratio, ball milling 16h, after milling 2wt% Al was added. Double side pressing, 55% packing density                                                                                                                                                      | MA 1-5 min, Tc decreases from 2000 to 1700°C with MA, combustion velocity has unstable behavior | Ti <sub>3</sub> AlC <sub>2</sub> (45%), TiC (34%) and Ti <sub>2</sub> AlC (13%) at 5 min MA                                                                                                                                                                                                                                             | Potantin 2015 [15] | By adding TiH <sub>2</sub> , the content of Ti <sub>3</sub> AlC <sub>2</sub> MAX phase can be increased after SHS. Optimal MA duration is 3 min. MA increases TiC content.                   |
| 39 | To obtain large, dense samples of MAX-phase Ti <sub>3</sub> AlC <sub>2</sub>   | SHS synthesized Ti-Al intermetallics, Ti, graphite, ball milling 24h, then SHS of powder mixture. SHS prepared Ti <sub>2</sub> AlC powder was hot-pressed at 1100°C, for 1 hour at 25MPa. In the case of Ti <sub>3</sub> AlC <sub>2</sub> powder temperature was 1300°C. |                                                                                                 | After SHS 73.8 wt.% of Ti <sub>3</sub> AlC <sub>2</sub> , 11.3 wt.% of Ti <sub>2</sub> AlC, and 14.8 wt.% of TiC. Ti <sub>2</sub> AlC phase (95.4 wt%) and TiAl <sub>2</sub> phase (4.6 wt.%). After hot pressing (98.7 wt.% of Ti <sub>2</sub> AlC) with low amount of TiC impurities, and Ti <sub>3</sub> AlC <sub>2</sub> 90.3 % and | Chlubny 2015 [47]  | SHS and HP combination allot to obtain single phase (Ti <sub>2</sub> AlC) or near single phase (Ti <sub>3</sub> AlC <sub>2</sub> ) materials. First one was porous, second one - very dense. |

| TiC9.7% at 1300oC. |                                                                                                                                          |                                                                                                                                                                                                                                                                                                 |                                                                                                                                                                                                                                                                                                                         |                                                                                                                                                                                                                                                                                                                                             |               |                                                                                                                                                                                                                                                                                                                            |
|--------------------|------------------------------------------------------------------------------------------------------------------------------------------|-------------------------------------------------------------------------------------------------------------------------------------------------------------------------------------------------------------------------------------------------------------------------------------------------|-------------------------------------------------------------------------------------------------------------------------------------------------------------------------------------------------------------------------------------------------------------------------------------------------------------------------|---------------------------------------------------------------------------------------------------------------------------------------------------------------------------------------------------------------------------------------------------------------------------------------------------------------------------------------------|---------------|----------------------------------------------------------------------------------------------------------------------------------------------------------------------------------------------------------------------------------------------------------------------------------------------------------------------------|
| 40                 | Ti <sub>3</sub> SiC <sub>2</sub> ,<br>Ti <sub>3</sub> AlC <sub>2</sub>                                                                   | Ti, Al, Si, carbon, TiC,<br>TiAl, TiSi <sub>2</sub> , SHS in air<br>of 8h milled, cold<br>pressed (~50%)<br>samples                                                                                                                                                                             | T <sub>c</sub> =2000oC in the<br>absence of TiC or TiAl                                                                                                                                                                                                                                                                 | Ti <sub>3</sub> AlC <sub>2</sub> with traces<br>of TiC, TiAl<br>Ti <sub>3</sub> SiC <sub>2</sub> with some<br>TiSi <sub>2</sub> , TiC                                                                                                                                                                                                       | Sun2014 [20]  | Aluminum should be<br>taken in excess, titanium-<br>coarse grained, soot -<br>instead of graphite, TiC<br>or TiAl as diluents to<br>provide mild<br>combustion, lower than<br>the decomposition<br>temperature of MAX<br>phases                                                                                            |
| 41                 | (Cr.V) <sub>2</sub> AlC/<br>Al <sub>2</sub> O <sub>3</sub> with<br>different<br>substitutional<br>proportions by<br>SHS<br>aluminothermy | SHS of Cr <sub>2</sub> O <sub>3</sub> -<br>V <sub>2</sub> O <sub>5</sub> -Al-Al <sub>4</sub> C <sub>3</sub> (1)<br>and Cr-V <sub>2</sub> O <sub>5</sub> -Al-<br>Al <sub>4</sub> C <sub>3</sub> (2), ball<br>milled, pressed to<br>7x13mm cylinders, 55<br>% relative density, in<br>Ar pressure | Reaction (1) U <sub>c</sub> = 1.3 -<br>4.7 mm/s for the<br>increase of x = 0.1-0.4,<br>and U <sub>c</sub> = 5.5 mm/s at<br>x=0.7, at that T <sub>c</sub> = 1212<br>- 1605 oC. For<br>Reaction (2), U <sub>c</sub> = 2.6 -<br>12.5 mm/s within y =<br>0.4-0.7.<br>up to 1400 oC at y =<br>0.5 and 1670 oC at y =<br>0.7. | Hexagonal Al <sub>2</sub> O <sub>3</sub> -<br>added (Cr <sub>1</sub> -<br>xV <sub>x</sub> ) <sub>2</sub> AlC<br>composites with x =<br>0.1-0.7 in mixture 1.<br>In mixture 2, (Cr <sub>1</sub> -<br>yV <sub>y</sub> ) <sub>2</sub> AlC with y =<br>0.4 was possible,.<br>y>0.4, in addition to<br>MAX phase<br>(Cr.V) <sub>2</sub> C forms. | Yeh 2014 [77] | Combustion limit was<br>observed at y<0.3 because<br>of low exothermicity, but<br>y>0.5 didn't lead to MAX<br>phase due to high<br>velocity and insufficient<br>reaction time. The use of<br>Al <sub>4</sub> C <sub>3</sub> instead of carbon<br>powders is to prevent<br>oxide precursors from<br>carbothermic reduction. |
| 42                 | Ti <sub>2</sub> AlC bulk<br>pellets, Φ150 ×<br>25 mm <sup>2</sup> in size<br>by SHS and<br>pseudoHIP                                     | Ti:Al:C(carbon<br>black)= 2.9:2:1 were<br>used to fabricate<br>Ti <sub>2</sub> AlC, milling 10h,<br>compressing 250kN<br>for 15s,                                                                                                                                                               |                                                                                                                                                                                                                                                                                                                         | Ti <sub>2</sub> AlC, and TiAl                                                                                                                                                                                                                                                                                                               | Bai2014 [84]  | The density and grain<br>size of Ti <sub>2</sub> AlC produced<br>by the SHS/ PHIP process<br>both increase with<br>increasing size of the<br>pellet (mean grain size is                                                                                                                                                    |

|    |                                                                                                                                                              |                                                                                                                                                                                      |                                                                                                                                                                   |                                                                                                                                                                                                                                                       |                 |                                                                                                                                                                                         |
|----|--------------------------------------------------------------------------------------------------------------------------------------------------------------|--------------------------------------------------------------------------------------------------------------------------------------------------------------------------------------|-------------------------------------------------------------------------------------------------------------------------------------------------------------------|-------------------------------------------------------------------------------------------------------------------------------------------------------------------------------------------------------------------------------------------------------|-----------------|-----------------------------------------------------------------------------------------------------------------------------------------------------------------------------------------|
|    |                                                                                                                                                              | 150mmx25mm and 55mmx20mm disks                                                                                                                                                       |                                                                                                                                                                   |                                                                                                                                                                                                                                                       |                 | 2.57mkm). The larger volume results in more heat, which would keep the fabricated product hot and plastic in high temperature for the longer time.                                      |
| 43 | Thermodynamic predictions for the Ti <sub>2</sub> AlC MAX-phase                                                                                              | Enthalpy-temperature calculations are presented for the reaction $2\text{Ti} + (1+y)\text{Al} + \text{C} \rightarrow \text{Ti}_2\text{AlC} + y\text{Al}$                             | If excess Al is added as a diluent, there is a decrease in T <sub>ad</sub> but it offers the potential to control the exothermicity of the SHS.                   | T <sub>ad</sub> ≥ 1800K and - ΔH <sub>r</sub> 298K/C <sub>p</sub> 298K ≥ 2000K, are shown to be applicable for Ti <sub>2</sub> AlC MAX phase                                                                                                          | Thomas2014 [10] | XRD confirms the presence of aluminium in samples with Al excess (y=0.3). The predicted T <sub>ad</sub> for the 2Ti: 1Al: 1C mixture of 2368K is similar to reported experimental data. |
| 44 | Ti <sub>2</sub> AlC <sub>x</sub> , Ti <sub>3</sub> AlC <sub>2x</sub> , and Cr <sub>2</sub> AlC <sub>x</sub> by SHS-PHIP from Ti-Cr-Al-C system ((2-m):m:1:1) | Ti, Cr, Al, and carbon black ball milled using ethanol, ZrO <sub>2</sub> balls, 12h. Compacted 20 MPa for 30s. After SHS they pressed by PHIP of 225 MPa, for 10-25s at 1550-1680 K. | When m of 0, 0.25, 0.50, 0.75, 1.00, 1.25, and 1.50, T <sub>c</sub> are 2194.3, 1655.8, 1598.1, 1558.2, 1301.5, 1256.9, and 1192.5 oC. m=1.75 and 2, no SHS mode. | Ti <sub>2</sub> AlC <sub>x</sub> , Ti <sub>3</sub> AlC <sub>2x</sub> , and Cr <sub>2</sub> AlC <sub>x</sub> by SHS were detected in the Ti-Cr- Al-C systems, as well as the binary carbide of TiC and intermetallics. Rod like structures are formed. | Ying2013 [12]   | Samples subjected to SHS-PHIP comprise higher density than only SHS prepared samples.                                                                                                   |
| 45 | Ti <sub>2</sub> AlN by SHS                                                                                                                                   | 2Ti, 1Al and 37wt%TiAl mixture as raw materials under different N <sub>2</sub> pressures. Wet mixing in ethanol 8h.                                                                  |                                                                                                                                                                   | Ti <sub>2</sub> AlN mainly, but there are TiN and AlTi <sub>3</sub> impurities. AlTi <sub>3</sub> disappears at P=8 MPa N <sub>2</sub>                                                                                                                | Tian2013 [54]   | Increasing N <sub>2</sub> pressure, the relative content of TiN increases, AlTi <sub>3</sub> decreases. Layered grains of the products become larger and tighter with                   |

|                              |                                                                                                                                                                                |                                                                                                                                                                                                                                                                                  |                                                                                                                                                                                                                                                           |                                                                                                                                                                                                                               |                                     |                                                                                                                                                           |
|------------------------------|--------------------------------------------------------------------------------------------------------------------------------------------------------------------------------|----------------------------------------------------------------------------------------------------------------------------------------------------------------------------------------------------------------------------------------------------------------------------------|-----------------------------------------------------------------------------------------------------------------------------------------------------------------------------------------------------------------------------------------------------------|-------------------------------------------------------------------------------------------------------------------------------------------------------------------------------------------------------------------------------|-------------------------------------|-----------------------------------------------------------------------------------------------------------------------------------------------------------|
| P=2,4,6,8 MPa N <sub>2</sub> |                                                                                                                                                                                |                                                                                                                                                                                                                                                                                  |                                                                                                                                                                                                                                                           |                                                                                                                                                                                                                               | increasing N <sub>2</sub> pressure. |                                                                                                                                                           |
| 46                           | MAX solid solutions (Ti <sub>1-x</sub> V <sub>x</sub> ) <sub>2</sub> AlC and (Cr <sub>1-y</sub> V <sub>y</sub> ) <sub>2</sub> AlC with Al <sub>2</sub> O <sub>3</sub> addition | TiO <sub>2</sub> /V <sub>2</sub> O <sub>5</sub> /Al/Al <sub>4</sub> C <sub>3</sub> and Cr <sub>2</sub> O <sub>3</sub> /V <sub>2</sub> O <sub>5</sub> /Al/Al <sub>4</sub> C <sub>3</sub> powder mixtures, ball milled, cold pressed, 55% density, 7x12 mm cylinder, Ar atmosphere | U <sub>c</sub> of Reaction (1) increases from 1.4 to 4.8 mm/s, at x=0.3-0.7, T <sub>c</sub> =1150-1550°C. When y=0.1-0.7, T <sub>c</sub> =1200-1600°C, U <sub>c</sub> =2.2-5.5 mm/s                                                                       | At x>0.4, (Ti,V) <sub>2</sub> AlC, Al <sub>2</sub> O <sub>3</sub> , (Ti,V)C are formed. When y=0.1-0.7, (Cr,V) <sub>2</sub> AlC, Al <sub>2</sub> O <sub>3</sub> , and 4.5-6.4wt% Cr <sub>7</sub> C <sub>3</sub> were present. | Yeh 2013 [66]                       | Increasing V <sub>2</sub> O <sub>5</sub> , increases the combustion temperature and reaction front velocity, facilitates the evolution of solid solution. |
| 47                           | Cr <sub>2</sub> AlC reinforced with alumina                                                                                                                                    | Cr <sub>2</sub> O <sub>3</sub> -Al-Al <sub>4</sub> C <sub>3</sub> powder compact with 3:5x:y ratio, x,y=1-1.5, dry milled, cold-pressed, cylinder 7x12mm, compaction density 60%, preheating 300°C                                                                               | T <sub>c</sub> =1245°C for 3:7.5:1 mixture, spinning combustion mode, U <sub>c</sub> ~3 mm/s. U <sub>c</sub> =1.5 mm/s was detected for 3Cr <sub>2</sub> O <sub>3</sub> + 5Al + 1.5Al <sub>4</sub> C <sub>3</sub> mixture                                 | Cr <sub>2</sub> AlC and Al <sub>2</sub> O <sub>3</sub> , with traces of Cr <sub>7</sub> C <sub>3</sub>                                                                                                                        | Yeh 2011 [70]                       | Combustion temperature and reaction front velocity increased with content of Al, but decreased with that of Al <sub>4</sub> C <sub>3</sub> .              |
| 48                           | (Ti <sub>1-x</sub> Nb <sub>x</sub> ) <sub>2</sub> AlC solid solutions, M-site solid solutions                                                                                  | from elemental Ti, Nb, Al carbon black and Ti, Al, Nb <sub>2</sub> O <sub>5</sub> /Al <sub>4</sub> C <sub>3</sub> -compacts, x=0.2-0.8                                                                                                                                           | U <sub>c</sub> decreases from 7.6 to 3.6 mm/s for elemental mixture with increasing x from 0.2 to 0.8 (T <sub>c</sub> =1200 to 1057°C). U <sub>c</sub> increases 4.1 to 11.4 mm/s from x=0.3 to 0.8 for thermite mixture (T <sub>c</sub> =1160 to 1652°C) | (Ti,Nb) <sub>2</sub> AlC and TiC from elements, and (Ti,Nb) <sub>2</sub> AlC, Al <sub>2</sub> O <sub>3</sub> , Nb <sub>2</sub> Al from the thermite mixture were produced                                                     | Yeh 2011 [33]                       |                                                                                                                                                           |

|    |                                                                                                                                           |                                                                                                                         |                                                                                                                                                                                                                           |                                                                                                                         |                |                                                                                                                                                                    |
|----|-------------------------------------------------------------------------------------------------------------------------------------------|-------------------------------------------------------------------------------------------------------------------------|---------------------------------------------------------------------------------------------------------------------------------------------------------------------------------------------------------------------------|-------------------------------------------------------------------------------------------------------------------------|----------------|--------------------------------------------------------------------------------------------------------------------------------------------------------------------|
| 49 | Ti <sub>2</sub> AlC <sub>0.5</sub> N <sub>0.5</sub> by combustion synthesis                                                               | Ti:Al <sub>4</sub> C <sub>3</sub> :Al (or AlN) = 2:1/6:1/3, milling cold pressing, SHS in N <sub>2</sub> atmosphere     | By increasing N <sub>2</sub> pressure T <sub>c</sub> and U increase, TiC amount too.                                                                                                                                      | Ti <sub>2</sub> AlC <sub>0.5</sub> N <sub>0.5</sub> with TiC, TiN, Ti <sub>3</sub> Al, AlN                              | Yeh2010 [50]   | Al containing mixture has higher exothermicity than AlN containing one.                                                                                            |
| 50 | SHS of Ti <sub>3</sub> AlC <sub>2</sub> /Al <sub>2</sub> O <sub>3</sub> and Ti <sub>2</sub> AlC/Al <sub>2</sub> O <sub>3</sub> composites | Ti-Al-C-TiO <sub>2</sub> system, ball milling, cold pressing, SHS in Ar                                                 | Decrease in both T <sub>c</sub> (from 1466 to 1313 K) and U <sub>c</sub> (from 14.3 to 0.95 mm/s) was observed at formation of Ti <sub>2</sub> AlC and Ti <sub>2</sub> AlC/Al <sub>2</sub> O <sub>3</sub> , respectively. | Ti <sub>3</sub> AlC <sub>2</sub> /Al <sub>2</sub> O <sub>3</sub> and Ti <sub>2</sub> AlC/Al <sub>2</sub> O <sub>3</sub> | Yeh2010 [63]   |                                                                                                                                                                    |
| 51 | Ti <sub>2</sub> AlN by Solid-Gas SHS with AlN- and TiN-Diluted Samples in N <sub>2</sub>                                                  | Elements, AlN, TiN ball milled, cold pressed, N <sub>2</sub> pressure from 0.45-0.79 MPa                                |                                                                                                                                                                                                                           | Ti <sub>2</sub> AlN, TiN and Ti-Al                                                                                      | Yeh2010 [55]   | TiN dilution at low pressure was more beneficial, than AlN at high N <sub>2</sub> pressure.                                                                        |
| 52 | Ti <sub>2</sub> AlC by laser induced SHS sintering                                                                                        | 2Ti/Al/C/Sn raw mixture. Mixing, milling 2h in ZrO <sub>2</sub> ball media, cold pressed, SHS in CO <sub>2</sub> laser. |                                                                                                                                                                                                                           | Ti <sub>2</sub> AlC (83wt%) and TiC                                                                                     | Liang2010 [18] | Sn additive improved the synthesis of Ti <sub>2</sub> AlC.                                                                                                         |
| 53 | Nb <sub>2</sub> AlC by SHS                                                                                                                | 3Nb <sub>2</sub> O <sub>5</sub> -xAl-Al <sub>4</sub> C <sub>3</sub> powder compacts                                     | Increasing Al from 9 to 13 mol, decrease in T <sub>c</sub> from 1800 to 1200°C, and U <sub>c</sub> from 12.5mm/s to 7.5 mm/s was observed.                                                                                | Nb <sub>2</sub> AlC, Al <sub>2</sub> O <sub>3</sub> , NbC, NbAl <sub>3</sub>                                            | Yeh2010 [69]   | The formation of Nb <sub>2</sub> AlC was effectively improved by the samples containing an appropriate amount of additional Al or Al <sub>4</sub> C <sub>3</sub> . |

|    |                                                                                                    |                                                                                                                                                                  |                                                                                                                                                 |                                                                                                                                                  |                     |                                                                                                                   |
|----|----------------------------------------------------------------------------------------------------|------------------------------------------------------------------------------------------------------------------------------------------------------------------|-------------------------------------------------------------------------------------------------------------------------------------------------|--------------------------------------------------------------------------------------------------------------------------------------------------|---------------------|-------------------------------------------------------------------------------------------------------------------|
| 54 | Synthesis of Ti <sub>3</sub> AlC <sub>2</sub> , Ti <sub>3</sub> AlC, and Ti <sub>2</sub> AlC       | Elements in the presence of TiAl                                                                                                                                 | The use of TiAl significantly reduces the combustion temperature                                                                                | Ti <sub>3</sub> AlC <sub>2</sub> , Ti <sub>3</sub> AlC, and Ti <sub>2</sub> AlC                                                                  | Lopacinski2010 [48] | Short letter                                                                                                      |
| 55 | Synthesis of nanolayered composite by SHS and PHIP                                                 | Ti:Cr:Al:C 1.5:0.5:1:1 mixing, milling, pressing, PHIP after SHS                                                                                                 | T=1800K, pressing between cooling 1610-1260K at 225 MPa for 25 s                                                                                | Ti <sub>3</sub> AlC <sub>2</sub> , Cr <sub>2</sub> AlC and TiC bulk nanoceramic                                                                  | Ying2010 [87]       | The formation of the MAX phases is detected as in situ synthesis while the system is cooling.                     |
| 56 | MA SHS in Ti-Al-C                                                                                  | Elements, up to 40h milling, 250 rpm                                                                                                                             |                                                                                                                                                 | Ti <sub>2</sub> AlC and Ti <sub>2</sub> AlC/Ti <sub>3</sub> AlC <sub>2</sub>                                                                     | Hendaoui2010 [16]   | MA increases TIC amount, cooling rate was found beneficial for SHS control, Al excess promote MAX phase formation |
| 57 | The influence of Al on Ta <sub>2</sub> AlC SHS process                                             | Ta:Al:C = 2:1:1. Ta:Al:C = 2:1.4:0.8 and 2:1.6:0.8, ball milled, cold pressed, SHS in Ar.                                                                        | Al decreases U <sub>c</sub> from 6.5mm/s to 3mm/s, and T <sub>c</sub> from 1250 to 1050oC but contribute to Ta <sub>2</sub> AlC formation.      | Ta <sub>2</sub> AlC, Ta <sub>4</sub> AlC <sub>3</sub> , Ta <sub>2</sub> C. Single-phase Ta <sub>2</sub> AlC was obtained from Ta:Al:C = 2:1.6:1. | Yeh2009 [40]        |                                                                                                                   |
| 58 | The impact of TiC and Al <sub>4</sub> C <sub>3</sub> addition on the SHS process of Ti-Al-C system | Ball milling of elemental powder compacts of Ti:Al:C = 2:1:1 in the presence of TiC(6.67–14.3 mol%, and Al <sub>4</sub> C <sub>3</sub> (1.96–10 mol%), SHS in Ar | T <sub>c1</sub> =1200oC, U <sub>c</sub> =14.3mm/s. T <sub>c2</sub> =1100oC with TiC, T <sub>c3</sub> =900oC with Al <sub>4</sub> C <sub>3</sub> | Ti <sub>2</sub> AlC, TiC                                                                                                                         | Yeh2009 [45]        | TiC diluted mixture produces up to 90%MAX phase in the product.                                                   |
| 59 | Bulk Ti <sub>2</sub> AlC by SHS and pseudo HIP                                                     | 10 h milling of elements non-stoichiometric mixtures 2.9:2:1, SHS                                                                                                |                                                                                                                                                 | Nonstoichiometric Ti <sub>2</sub> AlC <sub>x</sub> (x = 0.69) with grain size of 6 mkm with some                                                 | Bai 2009 [85]       | .                                                                                                                 |

|    |                                                                                                                              | in air                                                                                                                                                                              |                                                                                                                                                                                                                                                                                                   | TiAl                                                                                                                                                                                                                                                |                   |                                                                                                                                                                                         |
|----|------------------------------------------------------------------------------------------------------------------------------|-------------------------------------------------------------------------------------------------------------------------------------------------------------------------------------|---------------------------------------------------------------------------------------------------------------------------------------------------------------------------------------------------------------------------------------------------------------------------------------------------|-----------------------------------------------------------------------------------------------------------------------------------------------------------------------------------------------------------------------------------------------------|-------------------|-----------------------------------------------------------------------------------------------------------------------------------------------------------------------------------------|
| 60 | Al <sub>4</sub> C <sub>3</sub> influence on Ti <sub>3</sub> AlC <sub>2</sub> by SHS                                          | both the elemental powder compacts of Ti:Al:C = 3:1:2 and the Al <sub>4</sub> C <sub>3</sub> (1.85-5.56 mol%) containing samples were ball milled, cold pressed and combusted in Ar | T <sub>c</sub> =1300-1400oC                                                                                                                                                                                                                                                                       | Ti <sub>3</sub> AlC <sub>2</sub> , Ti <sub>2</sub> AlC, TiV                                                                                                                                                                                         | Yeh2009 [43]      | With an increase in the Al <sub>4</sub> C <sub>3</sub> content, T <sub>c</sub> and U <sub>c</sub> decreased, but the degree of Ti <sub>3</sub> AlC <sub>2</sub> formation was improved. |
| 61 | SHS in Ti-Al-C system                                                                                                        | Elements, mixing, milling, pressing to a relative density 60%, in Ar                                                                                                                | T <sub>c</sub> =2000K                                                                                                                                                                                                                                                                             | Ti <sub>2</sub> AlC with up to 2wt%TiC                                                                                                                                                                                                              | Hendaoui2008 [11] | Fast heating, long dwell at given temperature, fast cooling                                                                                                                             |
| 62 | Ceramic nanolaminates, of Ti <sub>3</sub> SiC <sub>2</sub> , Ti <sub>3</sub> AlC <sub>2</sub> and Ti <sub>2</sub> AlN by SHS | Ti, C, TiAl and Ti <sub>3</sub> Al, mixing, SHS in nitrogen atmosphere                                                                                                              | See Pampuch 1989                                                                                                                                                                                                                                                                                  | Ti <sub>3</sub> AlC <sub>2</sub> was 40wt% when using TiAl and up to80% when using Ti <sub>3</sub> Al Ti <sub>2</sub> AlN accompanied by small amount of TiN, Ti <sub>3</sub> AlN and Ti <sub>3</sub> Al when TiAl or Ti <sub>3</sub> Al were used. | Lis2008 [58]      | Using both TiAl and Ti <sub>3</sub> Al, then TiN as a dominating phase and small quantities of Ti <sub>2</sub> AlN, Ti <sub>3</sub> Al and AlN are formed.                              |
| 63 | Ti <sub>2</sub> AlC and Ti <sub>3</sub> AlC <sub>2</sub>                                                                     | Elements, TiC, ball milling 8h                                                                                                                                                      |                                                                                                                                                                                                                                                                                                   | Ti <sub>2</sub> AlC, TiC<br>Ti <sub>3</sub> AlC <sub>2</sub> , TiC                                                                                                                                                                                  | Liu2007 [24]      |                                                                                                                                                                                         |
| 64 | SHS in 7 different Ti-Al-C-N systems                                                                                         | Ti-Al-C 312<br>TiAl, 2Ti, 2C<br>Ti <sub>3</sub> Al, 2C<br>4Ti,2Al, N <sub>2</sub><br>2TiAl, 2Ti, N <sub>2</sub><br>Ti <sub>3</sub> Al, 2Al, 3N <sub>2</sub>                         | 83% TiC, 17% Ti <sub>2</sub> AlC<br>64% TiC, 36% Ti <sub>3</sub> AlC <sub>2</sub><br>87% Ti <sub>3</sub> AlC <sub>2</sub> , 13% TiC<br>66% TiN, 15% AlN, 7% Ti <sub>3</sub> AlN, 12% (TiAl+Ti <sub>3</sub> Al+AlTi <sub>3</sub> )<br>57% Ti <sub>2</sub> AlN, 24% TiN, 11% Ti <sub>3</sub> Al, 8% |                                                                                                                                                                                                                                                     | Chlubny 2006 [49] | Low nitrogen pressure during Ti <sub>2</sub> AlN synthesis promotes the formation of ternary compounds.                                                                                 |

|    |                                                               |                                                                                                   |                                                                                            |                                                                         |                    |                                                                                                                            |
|----|---------------------------------------------------------------|---------------------------------------------------------------------------------------------------|--------------------------------------------------------------------------------------------|-------------------------------------------------------------------------|--------------------|----------------------------------------------------------------------------------------------------------------------------|
|    |                                                               | Ti3Al,TiAl,N2, loose powder bed, 0.5 MPa N2 pressure                                              | Ti3AlN<br>54% TiN, 23% Ti2AlN, 17% Ti3Al, 6% AlN<br>54% TiN, 23% Ti2AlN, 17% Ti3Al, 6% AlN |                                                                         |                    |                                                                                                                            |
| 65 | SHS of Ti2AlC1-x                                              | Ti:Al:C=3:1.5:1=2:1:0.7, ball milling 8h, cold pressing, vacuum combustion.                       | The maximum temperature for the formation of Ti2AlC1-x is about 1625±10oC                  | Ti2AlC1-x, Ti3AlC2, TiC                                                 | Chen 2004 [25]     | The reaction Ti+C=TiC is the main heating resource for driving the reactions leading to the formation of ternary carbides. |
| 66 | SHS of Ti3SiC2                                                | Using 3Ti + SiC + C reactants, mixing, cold pressing at 180 MPa, preheating, >100°/min, Tig=870°C |                                                                                            | 78%Ti3SiC2, 17%TiCx and 5%Ti5Si3Cx                                      | Riley 2003 [59]    |                                                                                                                            |
| 67 | Dense Ti3SiC2-based ceramics by thermal explosion (TE)        | Elements 3:1:2 ratio, 1 min 80 MPa pressure during TE (so called reactive forging)                | 1. Tc=1800oC<br>2. TE of 3Ti–Si–2C 1000oC preheated compacts observed with Tc=1200oC.      | 45 vol.% Ti3SiC2 with TiC, Ti5Si3 or Ti3SiC2–TiSi2–SiC eutectic mixture | Khoptiar 2003 [35] |                                                                                                                            |
| 68 | SHS in the Ti-Al-C mixture with different amounts of elements | Ti, Al, C mixture, 8h ball milled, cold-pressed. SHS in vacuum                                    | Tc=1800oC                                                                                  | Ti3AlC2, Ti2AlC, TiC                                                    | Ge2003 [23]        | Of note, TiC with Al coated core-shell composite will be beneficial for reactive sintering and SHS.                        |
| 69 | Ti3SiC2 formation mechanism                                   | 3Ti – SiC - C, cold pressed mixture, Vh=100oC/min                                                 | Tc= 2320°C, conversion degree 80wt%                                                        | Ti3SiC2, TiCx                                                           | Riley2002 [60]     |                                                                                                                            |
| 70 | Pressure-assisted TE synthesis of dense Ti2AlC                | 2Ti-Al-C, 30 MPa pressure during TE at 800 oC.                                                    |                                                                                            | Ti2AlC up to 90% and TiC1-x during pressureless synthesis, but          | Khoptiar2002 [22]  | Ti2AlC was formed during cooling from the high combustion temperature (>2000 oC)                                           |



|    |                                                                                                              |                                                                                                                                              |                                                                                            |                                                                                                                  |                         |                                                                                                                                                                      |
|----|--------------------------------------------------------------------------------------------------------------|----------------------------------------------------------------------------------------------------------------------------------------------|--------------------------------------------------------------------------------------------|------------------------------------------------------------------------------------------------------------------|-------------------------|----------------------------------------------------------------------------------------------------------------------------------------------------------------------|
|    |                                                                                                              |                                                                                                                                              |                                                                                            | pressure assisted<br>TE lead to an<br>appreciable amount<br>of TiC <sub>1-x</sub> .                              |                         | by a peritectic reaction<br>between the earlier<br>formed liquid Ti<br>aluminides and a solid Ti<br>carbide, TiC <sub>1-x</sub>                                      |
| 71 | Ti <sub>3</sub> AlC <sub>2</sub> and<br>Ti <sub>2</sub> AlC by SHS                                           | Ti, Al, C, ball milled<br>for 24h, 2:1:1 ratio,<br>cold-pressed, SHS in<br>vacuum.                                                           | U <sub>c</sub> =2.8-7.9 mm/s                                                               | Ti <sub>3</sub> AlC <sub>2</sub> and<br>Ti <sub>2</sub> AlC (after acid<br>leaching aimed at<br>removal of TiAl) | Zhou 2001 [13]          | Authors recommended to<br>use Al <sub>4</sub> C <sub>3</sub> instead of Al,<br>as the latter has high<br>vapor pressure.                                             |
| 72 | TiAlC <sub>2</sub> single<br>step SHS in<br>controlled mode                                                  | TiAl, C mixture was<br>ball milled for 6 h,<br>loose powder bed in<br>graphite boat, SHS in<br>1 atm Ar                                      | T <sub>c</sub> =1396°C,<br>U <sub>c</sub> =5.9mm/s for<br>Ti <sub>3</sub> AlC <sub>2</sub> | Ti <sub>3</sub> AlC <sub>2</sub> , TiC                                                                           | Lopacinski 2001<br>[44] | TiAl using reduces T <sub>c</sub> ,<br>hence easy to<br>deagglomerate powder                                                                                         |
| 73 | Ti <sub>3</sub> SiC <sub>2</sub> by the<br>field-activated,<br>pressure-<br>assisted<br>combustion<br>method | Ti, Si, graphite, 20 h<br>ball milling, 3:1:2<br>ratio, cold pressed                                                                         | U <sub>c</sub> =18.8 mm/s<br>T <sub>c</sub> = 2260 °C, (T <sub>ad</sub> =<br>2735°C)       | Ti <sub>3</sub> SiC <sub>2</sub> , 2%TiC                                                                         | Feng 1999 [36]          | The greatest conversion<br>(>98%) is attained for<br>samples held at 1525°C<br>for 2 h after SHS ignition.<br>When holding time is<br>zero, only TiC is<br>observed. |
| 74 | Ti-Al-C ternary<br>system                                                                                    | Ti, TiAl, Al, TiC,<br>Al <sub>4</sub> C <sub>3</sub> , graphite                                                                              |                                                                                            | Ti <sub>2</sub> AlC, Ti <sub>3</sub> AlC,<br>Ti <sub>3</sub> AlC <sub>2</sub>                                    | Pietzka1994 [91]        | The newly discovered<br>phase was isotopic with<br>Ti <sub>3</sub> SiC <sub>2</sub>                                                                                  |
| 75 | Ti <sub>3</sub> SiC <sub>2</sub><br>preparation by<br>SHS                                                    | Using elemental<br>powders 3:1:2,<br>preheating of<br>mixture inductively<br>up to 800°C, then<br>rapidly at a rate of<br>500K/min, to 1050- |                                                                                            | Ti <sub>3</sub> SiC <sub>2</sub> with some<br>TiC                                                                | Pampuch 1989<br>[2]     | Curious mechanical<br>properties of MAX<br>phases were observed.<br>This work opened new<br>platform for further<br>exploration of MAX<br>phases.                    |

---

1200°C.

---
